# Supplementary material
Source: publisher site journal article supplement (https://www.dovepress.com/article/234171)
Supplement: Supplementary file 1 [file get_supplementary_file.php]

**Student's guide for model making activity for 1<sup>st</sup> year MBBS**

1. All the students of 1<sup>st</sup> professional MBBS have to participate in model making activity in Physiology
2. The students will be divided into groups of 10 students in each group.
3. The students have to meet the faculty in charge to discuss for the same
4. Each of the group has to prepare working models by themselves
5. The group members must choose a topic in Physiology and the group representatives have to intimate faculty in charge about their topic.
6. The model prepared by one group should not be replicated by the other group
7. Models should not be too large or too small. They should be made/placed on an acrylic sheet base with an area of 40 cm × 40 cm
8. The students can refer to books/journals from departmental library, central institute library, you tube videos, etc for preparing working models
9. The students must report to faculty in charge every week and discuss about their models/topics
10. The students may also discuss or seek advice regarding their models/topics from any faculty in the department other than faculty in charge of the activity
11. An exhibition will be organized at the end of the activity and certificates will be awarded
12. The models will be assessed on the basis of neatness, originality of idea, complexity of model, presentation and utility to medical education

**Feedback survey form on model making by first year MBBS students**

**Write Yes or No in the appropriate boxes:**

| <b>Subject</b>                                                                                                       | <b>Strongly agree</b> | <b>Agree</b> | <b>Neutral</b> | <b>Disagree</b> | <b>Strongly Disagree</b> |
|----------------------------------------------------------------------------------------------------------------------|-----------------------|--------------|----------------|-----------------|--------------------------|
| 1. Was it helpful in understanding Physiology topic?                                                                 |                       |              |                |                 |                          |
| 2. Did you find the model making useful and interesting?                                                             |                       |              |                |                 |                          |
| 3. Did you feel that during the process of model making you were able to understand the concept better than earlier? |                       |              |                |                 |                          |
| 4. Did it help in building logical thinking on the mechanism of action of the given topic?                           |                       |              |                |                 |                          |
| 5. Did you gain confidence during the process of model making?                                                       |                       |              |                |                 |                          |
| 6. Did it give you ability to work in groups?                                                                        |                       |              |                |                 |                          |
| 7. Did all the members in your group contribute in the model making?                                                 |                       |              |                |                 |                          |
| 8. Did you get support from your teachers for the activity?                                                          |                       |              |                |                 |                          |
| 9. Do you want more model making assignments should be allotted throughout the year?                                 |                       |              |                |                 |                          |
| 10. Will you recommend your friends studying in other colleges to participate in such activities?                    |                       |              |                |                 |                          |

**Other comments:**

**Guidelines for model making competition for faculty**

1. Physiology working model making competition will be organized by the department
2. Faculty in charge for the activity has to ensure for the conduction of the activity
3. Faculty in charge has to interact with group members/representatives every week for the progress of the activity
4. Other faculty members have to help students with ideas, concept regarding models
5. An exhibition will be organized at the end of the activity
6. Three senior faculty members of the department will be judging the models
7. The models will be assessed on the basis of neatness, originality of idea, complexity of model, presentation and utility to medical education.
8. Certificates will be awarded to the students. Faculty in charge has to prepare certificates and get it signed by the Head of the department and undergraduate course coordinator

## Model Competition

*Department of Physiology, AIIMS, Rishikesh*

### Assessment Schema of models

| <b>Group<br/>(Roll No.)</b> | <b>Topic</b>                                        | <b>Originality<br/>of idea<br/>(20 marks)</b> | <b>Presentation<br/>(20 marks)</b> | <b>Neatness<br/>and finish<br/>of model<br/>(20<br/>marks)</b> | <b>Complexity<br/>in working<br/>of model<br/>(20 marks)</b> | <b>Utility to<br/>medical<br/>education<br/>(20 marks)</b> | <b>Total<br/>(100<br/>marks)</b> |
|-----------------------------|-----------------------------------------------------|-----------------------------------------------|------------------------------------|----------------------------------------------------------------|--------------------------------------------------------------|------------------------------------------------------------|----------------------------------|
| <b>A<br/>(1-10)</b>         | <b>ECG &amp; its<br/>diagnostic<br/>App</b>         |                                               |                                    |                                                                |                                                              |                                                            |                                  |
| <b>B<br/>(11-20)</b>        | <b>Insulin<br/>secretion &amp;<br/>transduction</b> |                                               |                                    |                                                                |                                                              |                                                            |                                  |
| <b>C<br/>(21-30)</b>        | <b>Visual field<br/>defects</b>                     |                                               |                                    |                                                                |                                                              |                                                            |                                  |
| <b>D<br/>(31-40)</b>        | <b>Properties of<br/>synapse</b>                    |                                               |                                    |                                                                |                                                              |                                                            |                                  |
| <b>E<br/>(41-50)</b>        | <b>Conduction<br/>Pathways</b>                      |                                               |                                    |                                                                |                                                              |                                                            |                                  |
| <b>F<br/>(51-60)</b>        | <b>Mechanism<br/>of Hearing</b>                     |                                               |                                    |                                                                |                                                              |                                                            |                                  |
| <b>G<br/>(61-70)</b>        | <b>Renal<br/>tubular<br/>function</b>               |                                               |                                    |                                                                |                                                              |                                                            |                                  |
| <b>H<br/>(71-80)</b>        | <b>Basal ganglia<br/>pathways</b>                   |                                               |                                    |                                                                |                                                              |                                                            |                                  |
| <b>I<br/>(81-90)</b>        | <b>Blood<br/>coagulation</b>                        |                                               |                                    |                                                                |                                                              |                                                            |                                  |
| <b>J<br/>(91-100)</b>       | <b>Hemodialysis</b>                                 |                                               |                                    |                                                                |                                                              |                                                            |                                  |

Name –

Signature-

Date-

**Appendix D- Template of Certificates awarded to students**

**Model Making Competition**

**CERTIFICATE OF AWARD**

Mr/Ms. ....of 1<sup>st</sup> year MBBS (Batch.....) participated in the Model making competition in ..... and won..... Prize in the competition held on .....in the Department of .....

UG course co-ordinator

Head of the Department

**Model Making Competition**

**CERTIFICATE OF PARTICIPATION**

Mr/Ms..... of 1<sup>st</sup> year MBBS (Batch.....) participated in the Model making competition in ....., in the competition held on ..... in the Department of.....

UG course co-ordinator

Head of the Department
